# Supplementary material for: Facile synthesis of Li4Ti5O12/C composite with super rate performance
Source: Royal Society of Chemistry journal article supplement (doi:10.1039/c2ee22591c), 2012-01-01
Supplement: c2ee22591c.pdf [file c2ee22591c.pdf]

## Electronic Supplementary Information

### Facile synthesis of $\text{Li}_4\text{Ti}_5\text{O}_{12}/\text{C}$ composite with super rate performance

Baohua Li,<sup>a</sup> Cuiping Han,<sup>a,b</sup> Yan-Bing He,<sup>a</sup> Cheng Yang,<sup>a</sup> Hongda Du,<sup>a</sup> Quan-Hong Yang<sup>a,c,\*</sup> and Feiyu Kang<sup>a,b,\*</sup>

<sup>a</sup> Key Laboratory of Thermal Management Engineering and Materials, Graduate School at Shenzhen, Tsinghua University, Shenzhen 518055, China, yang.quanhong@mail.sz.tsinghua.edu.cn

<sup>b</sup> Laboratory of Advanced Materials, Department of Materials Science and Engineering, Tsinghua University, Beijing 100084, China, fykang@mail.tsinghua.edu.cn

<sup>c</sup> School of Chemical Engineering and Technology, Tianjin University, Tianjin 300072, China, qhyangcn@tju.edu.cn

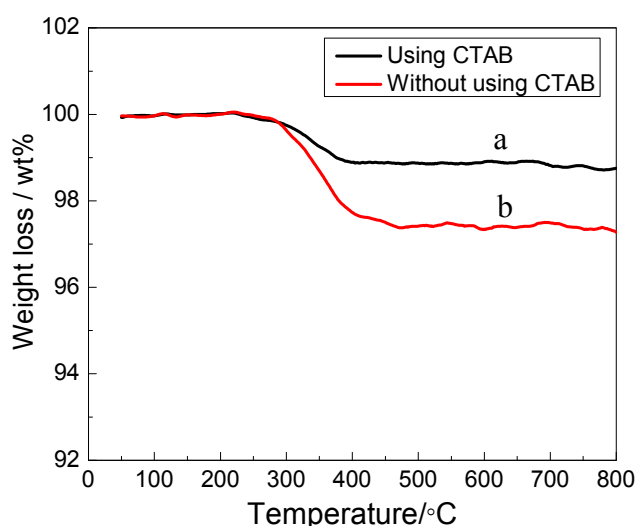

**Fig. S1** TG curves (Air atmosphere) of the obtained  $\text{Li}_4\text{Ti}_5\text{O}_{12}/\text{C}$  using CTAB (a) and without (b) using CTAB. The samples were subjected to an overnight drying to remove the adsorbed water before the TG measurements at a heating rate of  $10\text{ }^\circ\text{C min}^{-1}$  using Netzsch STA449F3 system (Germany). Based on the TG results, the amount of residual carbon in the  $\text{Li}_4\text{Ti}_5\text{O}_{12}/\text{C}$  material was roughly estimated ( $\sim 1.2\text{ wt}\%$  for the CTAB case and  $\sim 2.6\text{ wt}\%$  for the case without using CTAB).

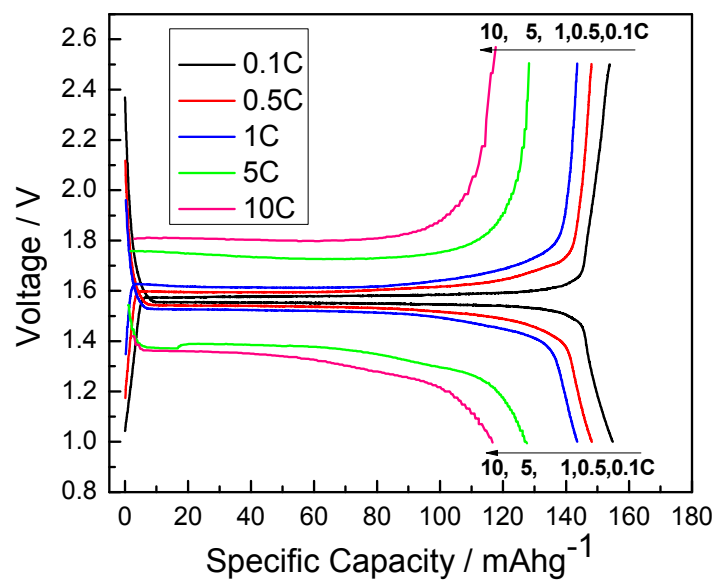

**Fig. S2** Rate charge and discharge curves of  $\text{Li}_4\text{Ti}_5\text{O}_{12}/\text{C}$  prepared in presence of CTAB (CTAB concentration:  $6.5\text{g L}^{-1}$ ).
